# Supplementary material for: Metal-free C–H amination of unactivated hydrocarbons with sulfonylimino-λ3-bromanes generated in situ from (diacetoxybromo)benzene
Source: Royal Society of Chemistry journal article supplement (doi:10.1039/c4ob02160f), 2014-12-19

**Electronic Supplementary Information (ESI)**

**Metal-free C–H amination of unactivated hydrocarbons with sulfonylimino- $\lambda^3$ -  
bromanes generated in situ from diacetoxybromobenzene**

Kazunori Miyamoto,\* Taiga Ota, Md. Mahbubul Hoque, and Masahito Ochiai

*Graduate School of Pharmaceutical Sciences, The University of Tokyo, 7-3-1 Hongo, Bunkyo-ku,  
Tokyo 113-0033, Japan*

*Graduate School of Pharmaceutical Sciences, University of Tokushima, 1-78 Shomachi,  
Tokushima 770-8505, Japan*

E-mail: kmiya@tokushima-u.ac.jp

**Table of Contents**

|                                                                                                        |       |
|--------------------------------------------------------------------------------------------------------|-------|
| 1. $^1\text{H}$ NMR spectrum of (2,2,2-trichloroethoxysulfonyl)imino- $\lambda^3$ -bromane (Figure S1) | S2    |
| 2. Oxidation of cyclohexane with diacetoxybromane (Scheme S1)                                          | S3    |
| 3. NMR Spectra                                                                                         | S4-S7 |

2. <sup>1</sup>H NMR spectrum of (2,2,2-trichloroethoxysulfonyl)imino-λ<sup>3</sup>-bromane (Scheme S1)

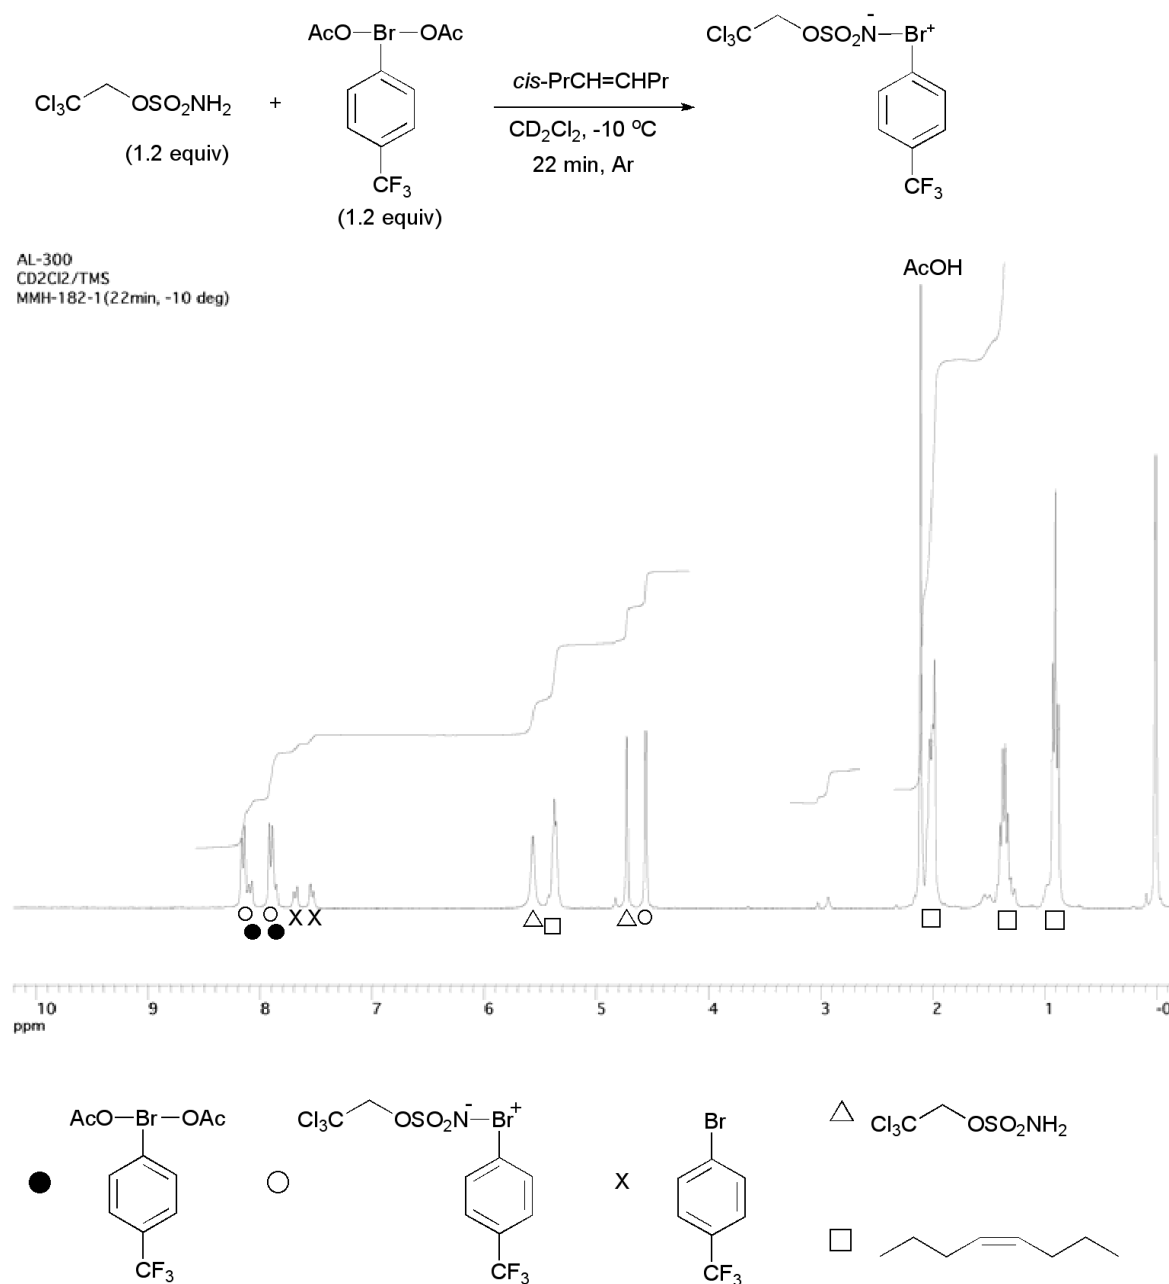

**Figure S1.** <sup>1</sup>H NMR spectrum of *N*-(2,2,2-trichloroethoxysulfonyl)imino-λ<sup>3</sup>-bromane measured at -10 °C in the presence of *cis*-4-octene: *p*-CF<sub>3</sub>C<sub>6</sub>H<sub>4</sub>Br(OAc)<sub>2</sub> (1.2 equiv)/CCl<sub>3</sub>CH<sub>2</sub>OSO<sub>2</sub>NH<sub>2</sub> (1.2 equiv)/*cis*-4-octene (1 equiv, 0.03 M)/CD<sub>2</sub>Cl<sub>2</sub>/-10 °C/22 min.

We could not detect desired *N*-(2,2,2-trichloroethoxysulfonyl)imino-λ<sup>3</sup>-bromane (open circle in the figure) in the absence of *cis*-4-octene. Coordination of olefin to the electron-deficient hypervalent bromine(III) center may occur under the conditions, which stabilizes transient imino-λ<sup>3</sup>-bromane (Cl<sub>3</sub>CH<sub>2</sub>OSO<sub>2</sub>N=BrAr).

3. Oxidation of cyclohexane with diacetoxy- $\lambda^3$ -bromane **2** in the presence of oxygen.

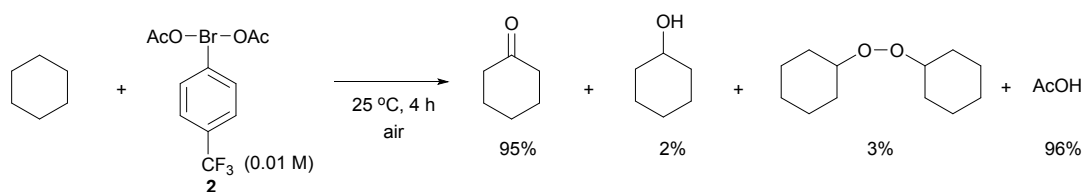

**Scheme S1.** Oxidation of cyclohexane with diacetoxy- $\lambda^3$ -bromane **2** under air. Yields of products were determined by GC (for cyclohexanone) and  $^1\text{H}$  NMR (CyOH,  $\text{C}_2\text{O}_2$ , and AcOH).

Formation of small amount of cyclohexanol/dicyclohexyl peroxide suggests the reaction mechanism involves the generation of cyclohexyl radical. Scopes and limitations of the reaction and mechanistic studies are now underway in our laboratory and will be reported in due course.

### 3. NMR spectra

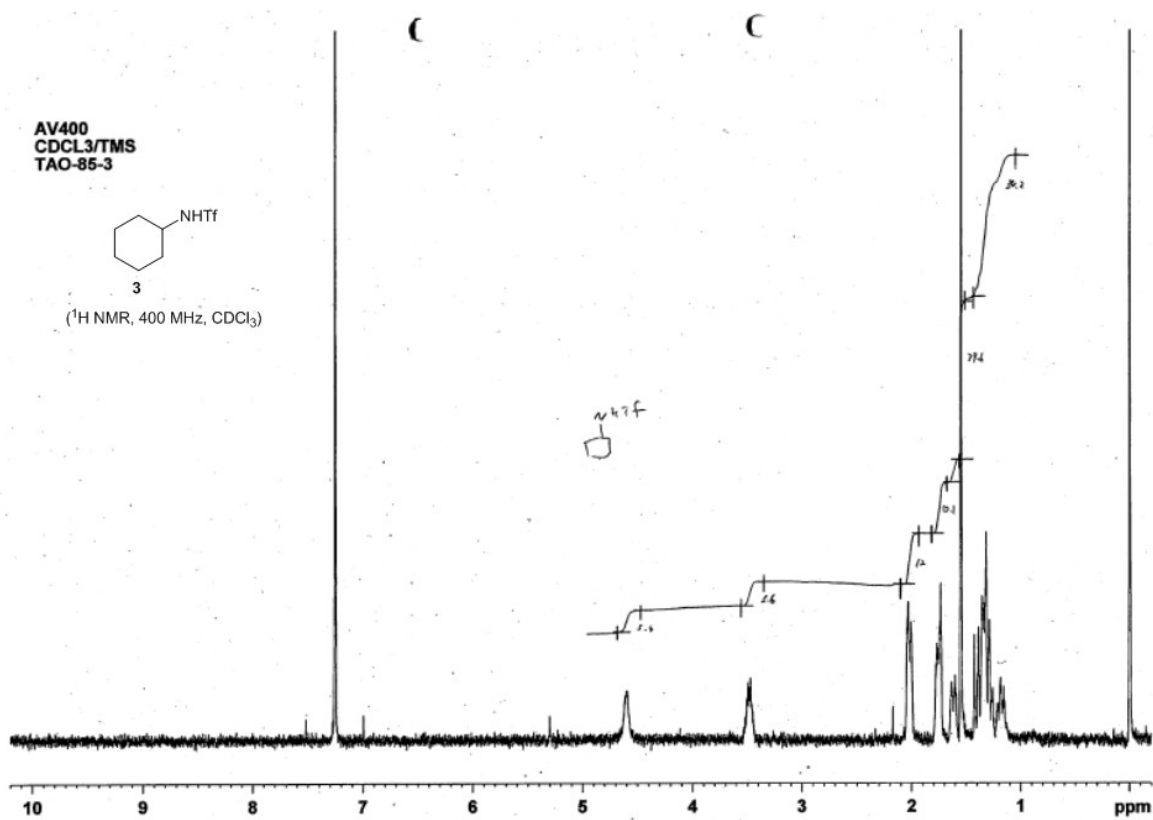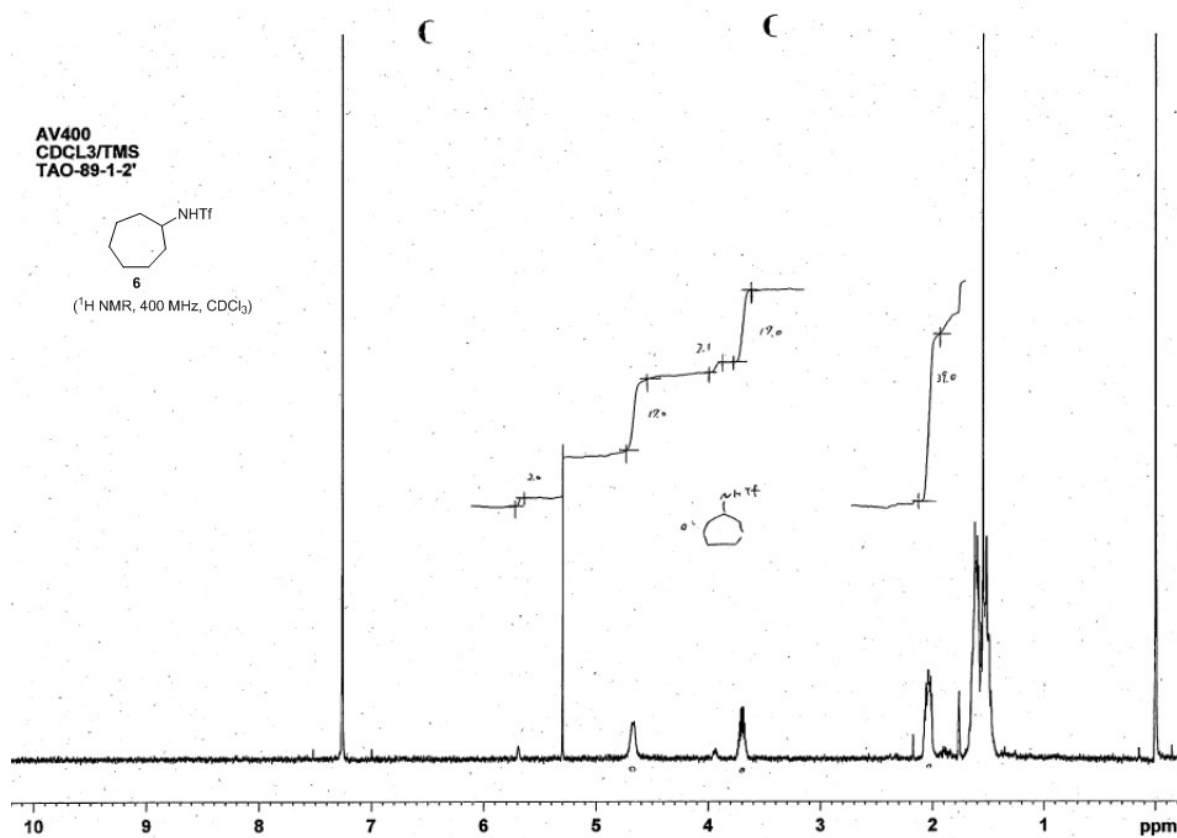

AV400  
CDCL3/TMS  
TAO-102

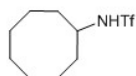

7  
(<sup>1</sup>H NMR, 400 MHz, CDCl<sub>3</sub>)

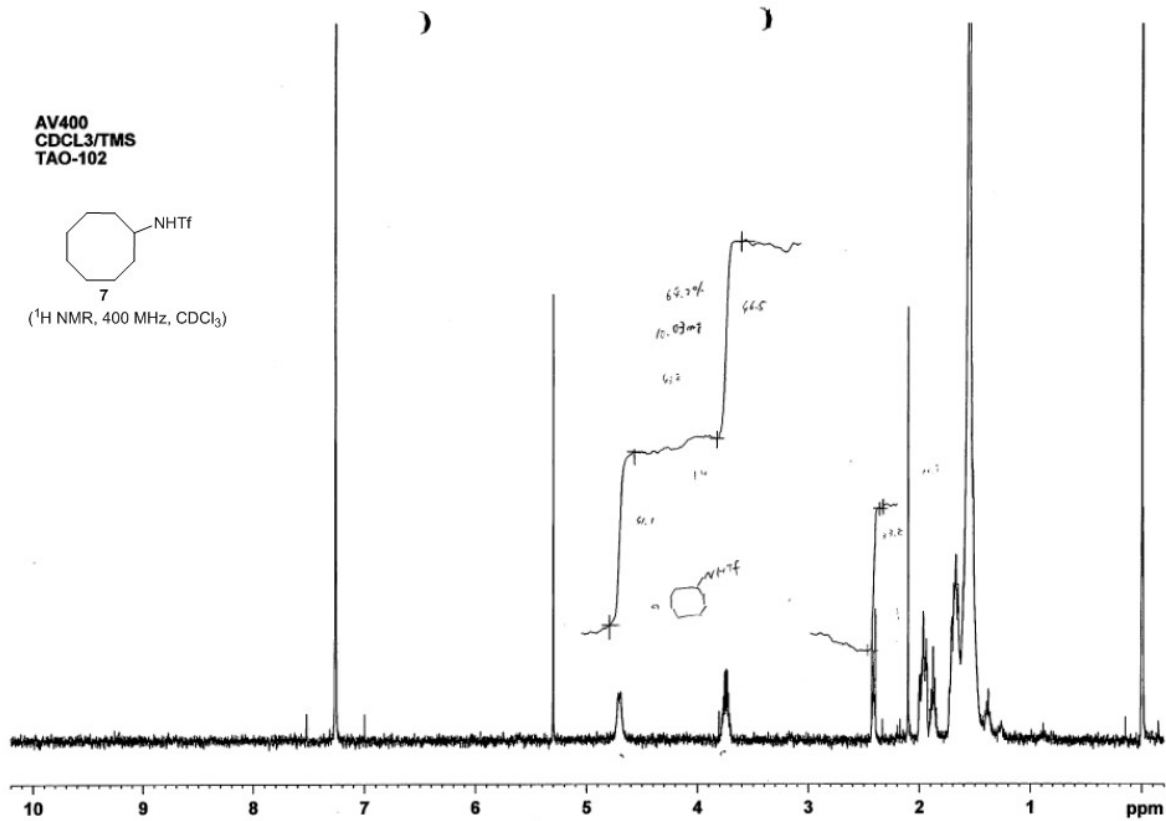

AL400  
CDCL3/TMS  
2,6-Dimethyl

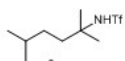

8  
(<sup>1</sup>H NMR, 400 MHz, CDCl<sub>3</sub>)

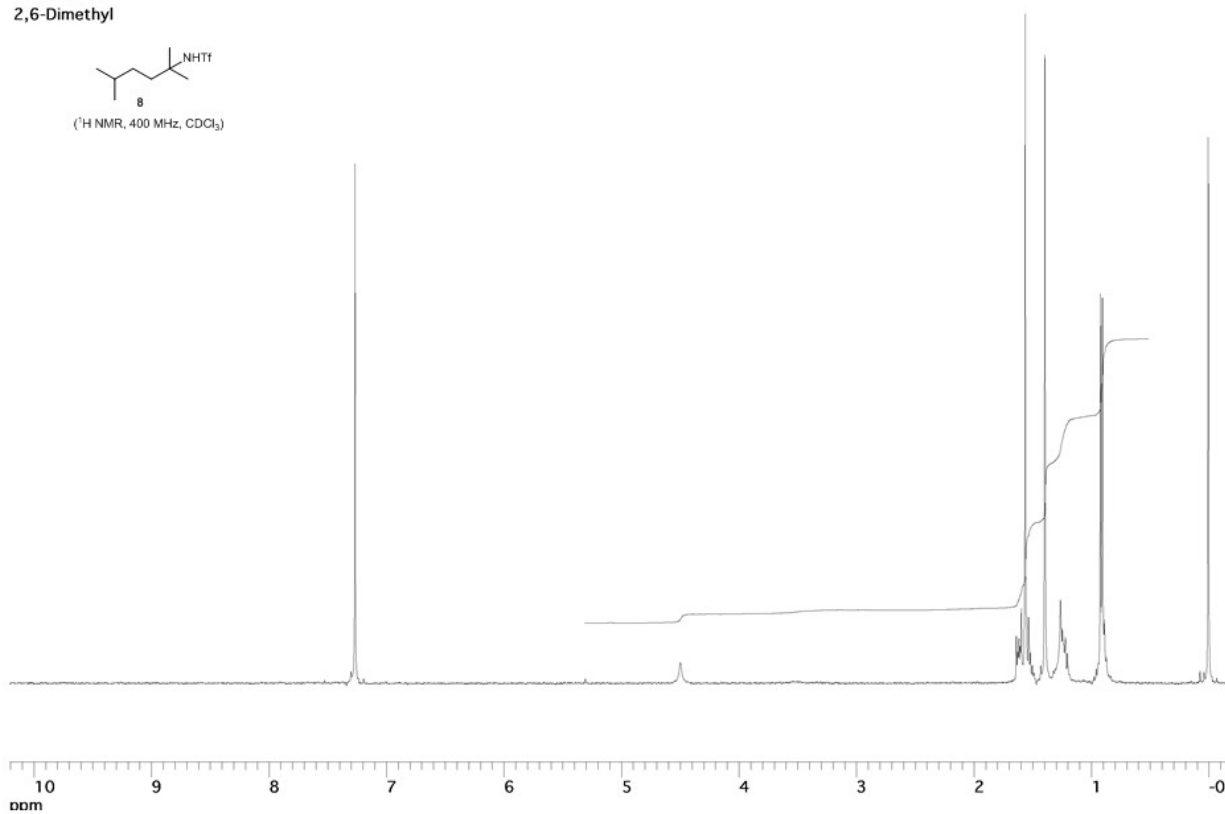

AL400  
CDCL<sub>3</sub>/TMS  
3-Mepentyl

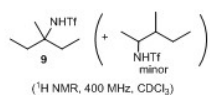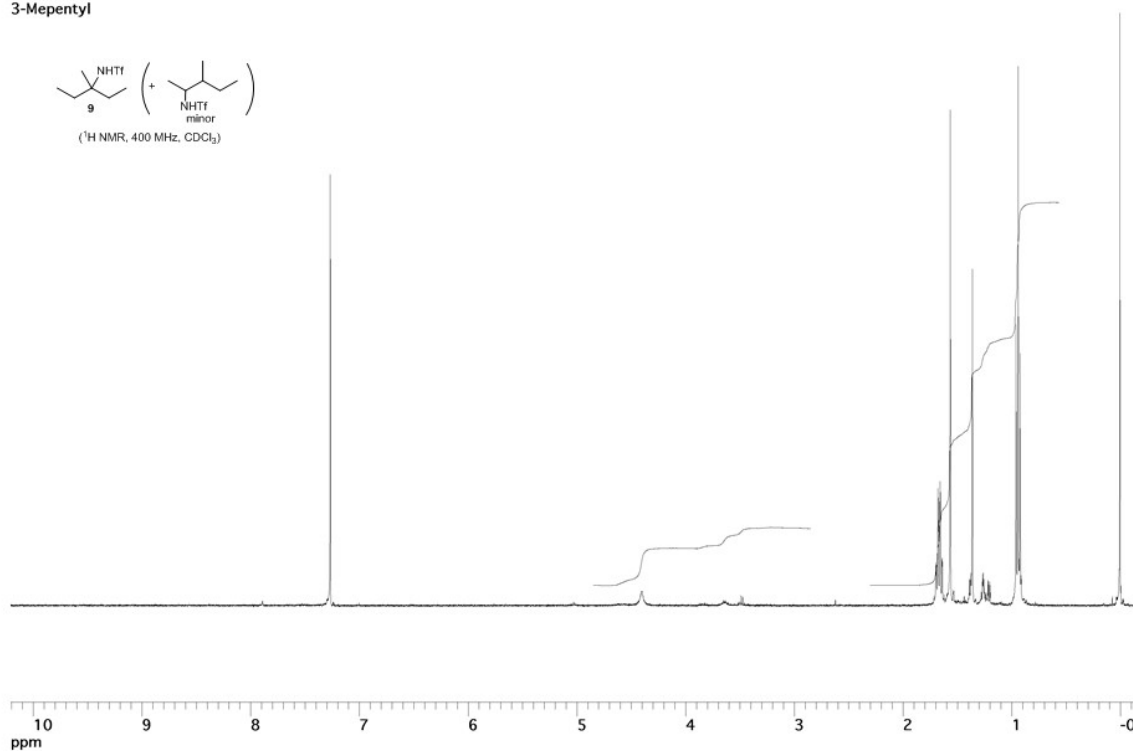

AL300  
CDCL<sub>3</sub>/TMS  
2-MeBu

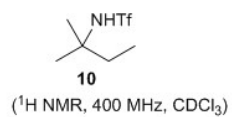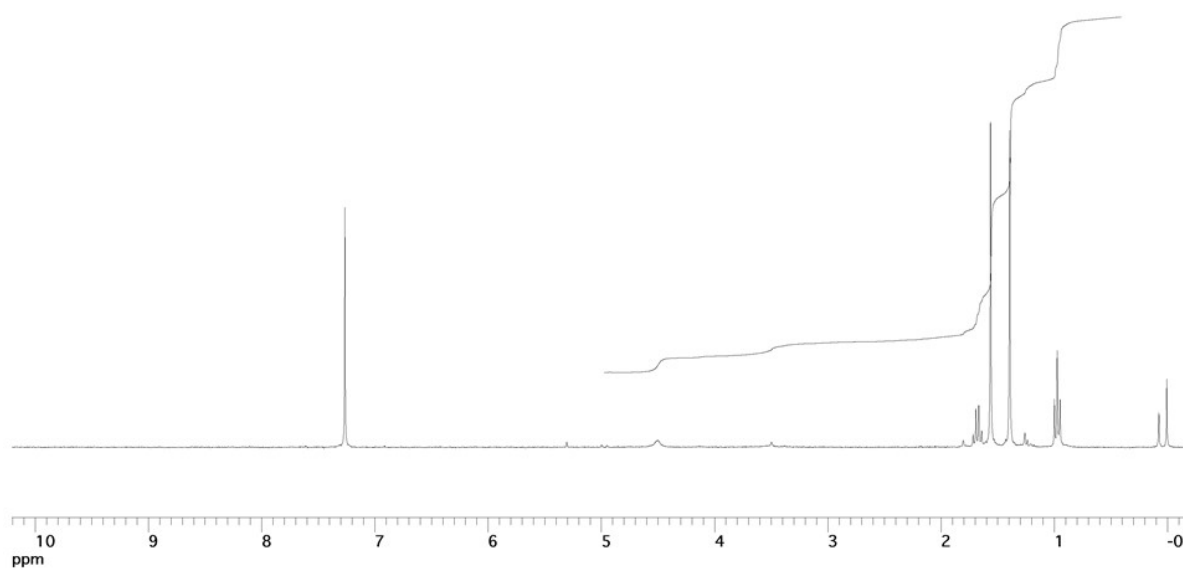

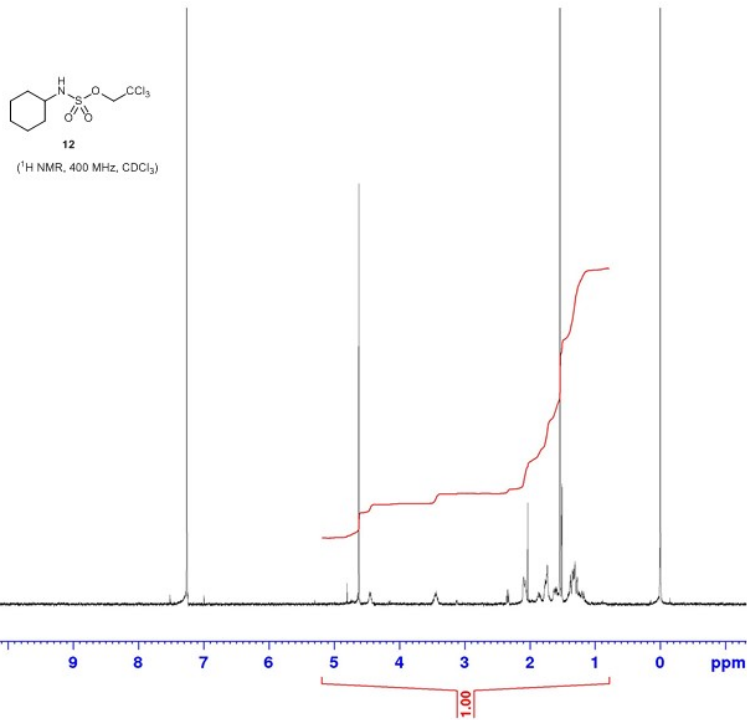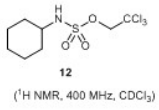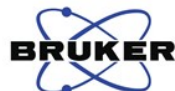

Current Data Parameters  
 NAME tao-157-1  
 EXPNO 10  
 PROCNO 1  
 F2 - Acquisition Parameters  
 Date\_ 20130712  
 Time 14.38  
 INSTRUM spect  
 PROBHD 5 mm PABBO BB-  
 PULPROG zg30  
 TD 65536  
 SOLVENT CDCl3  
 NS 4  
 DS 2  
 SMR 8223.685 Hz  
 FIDRES 0.125483 Hz  
 AQ 3.9845889 sec  
 RG 203  
 DM 60.800 usec  
 DE 6.50 usec  
 TE 299.6 K  
 D1 1.0000000 sec  
 TDO 1  
 ===== CHANNEL f1 =====  
 NUC1 1H  
 P1 14.00 usec  
 PL1 -1.10 dB  
 PLW 12.94374657 W  
 SFO1 400.1324710 MHz  
 F2 - Processing parameters  
 SI 32768  
 SF 400.1300096 MHz  
 WDW EM  
 SSB 0  
 LB 0.30 Hz  
 GB 0  
 FC 1.00

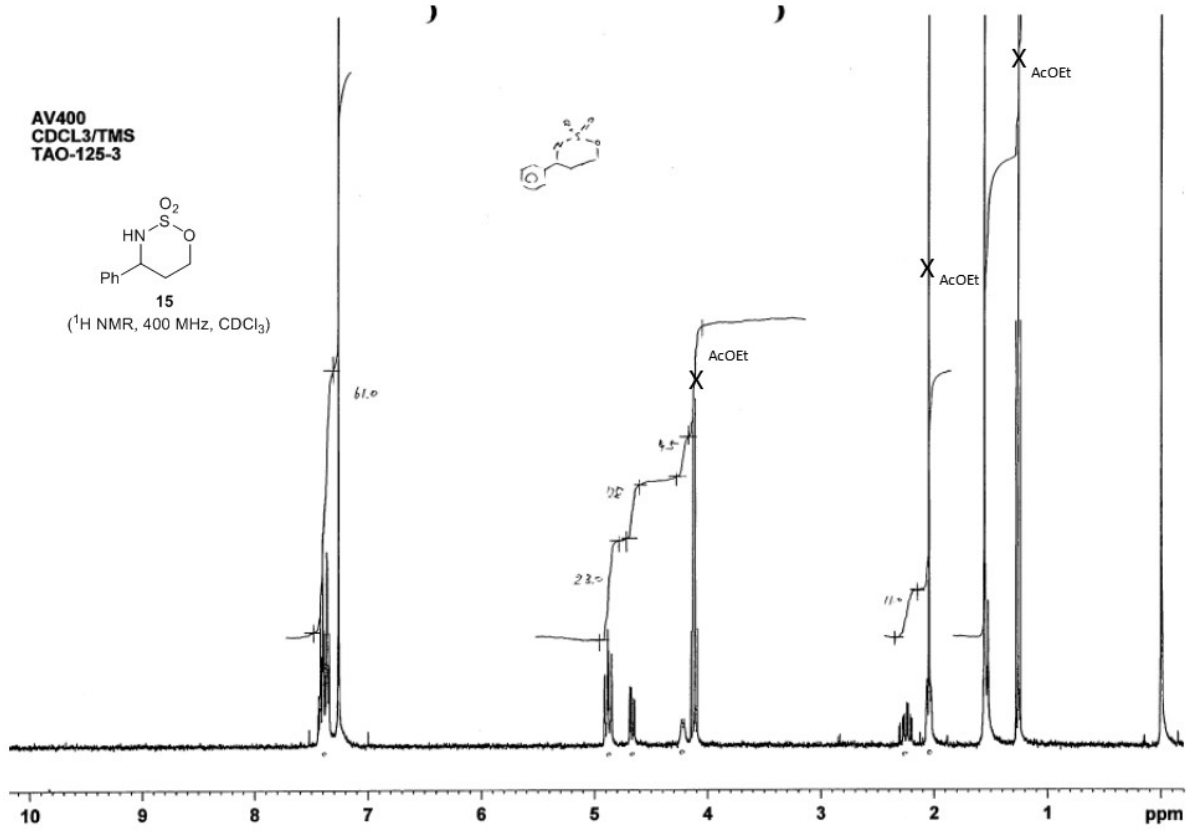

AV400  
 CDCL3/TMS  
 TAO-125-3

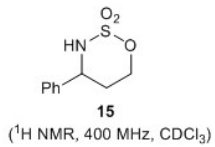

Supplement: c4ob02160f1.pdf [file c4ob02160f1.pdf]
